# Supplementary material for: Cerebral white matter hyperintensities on MRI and acceleration of epigenetic aging: the atherosclerosis risk in communities study
Source: PubMed Central journal article supplement (PMC5310061; doi:10.1186/s13148-016-0302-6), 2017-02-14
Supplement: 13148_2016_302_MOESM1_ESM.pdf [file 13148_2016_302_MOESM1_ESM.pdf]

| CPG_Labels | P_value  | effect_size | std_error | Infinium_Design_Type | CHR | MAPINFO   | Strand |
|------------|----------|-------------|-----------|----------------------|-----|-----------|--------|
| cg10262662 | 4.70E-06 | -0.0234     | 0.0051    | II                   | 16  | 70721696  | F      |
| cg11616701 | 5.05E-06 | -0.0153     | 0.0033    | II                   | 5   | 122950706 | F      |
| cg11845410 | 9.41E-06 | 0.0205      | 0.0046    | II                   | 20  | 30413603  | F      |
| cg04607024 | 9.60E-06 | -0.0378     | 0.0085    | II                   | 16  | 67696204  | F      |
| cg14917044 | 2.12E-05 | -0.0160     | 0.0037    | I                    | 12  | 122257870 | F      |
| cg24605950 | 2.15E-05 | 0.0789      | 0.0184    | II                   | 6   | 87222174  | F      |
| cg26531551 | 2.38E-05 | -0.0103     | 0.0024    | I                    | 13  | 113702436 | F      |
| cg00498591 | 2.55E-05 | 0.0083      | 0.0020    | I                    | 3   | 9904557   | F      |
| cg06708315 | 2.59E-05 | -0.0100     | 0.0024    | II                   | 17  | 73689641  | F      |
| cg06664900 | 2.88E-05 | -0.0241     | 0.0057    | II                   | 16  | 2073792   | R      |
| cg14852540 | 3.20E-05 | -0.0129     | 0.0031    | II                   | 17  | 79683076  | R      |
| cg14372120 | 3.21E-05 | -0.0153     | 0.0037    | II                   | 17  | 7258501   | R      |
| cg05779630 | 3.31E-05 | 0.0325      | 0.0078    | II                   | 4   | 7473106   | R      |
| cg10931853 | 3.67E-05 | -0.0489     | 0.0118    | I                    | 12  | 34548115  | F      |
| cg01973164 | 3.78E-05 | -0.0119     | 0.0029    | II                   | 16  | 89972593  | R      |
| cg26194514 | 3.98E-05 | -0.0259     | 0.0063    | II                   | 20  | 62575851  | F      |
| cg11402847 | 4.02E-05 | -0.0056     | 0.0014    | II                   | 6   | 31475203  | F      |
| cg19616532 | 4.04E-05 | -0.0110     | 0.0027    | II                   | 10  | 71869135  | F      |
| cg27081585 | 4.11E-05 | -0.0124     | 0.0030    | II                   | 12  | 107280558 | R      |
| cg07804260 | 4.38E-05 | -0.0220     | 0.0053    | II                   | 11  | 2397977   | F      |
| cg01669186 | 4.47E-05 | 0.0078      | 0.0019    | I                    | 11  | 430919    | R      |
| cg26721908 | 4.72E-05 | -0.0209     | 0.0051    | II                   | 21  | 47610096  | R      |
| cg17164315 | 4.89E-05 | -0.0564     | 0.0138    | I                    | 6   | 28607804  | F      |
| cg02385230 | 4.95E-05 | -0.0119     | 0.0029    | II                   | 17  | 38605309  | F      |
| cg15708373 | 5.10E-05 | -0.0025     | 0.0006    | II                   | 8   | 81397789  | R      |
| cg15198148 | 5.24E-05 | -0.0946     | 0.0232    | II                   | 1   | 46858748  | R      |
| cg00807877 | 5.45E-05 | -0.0495     | 0.0122    | II                   | 14  | 70095319  | R      |
| cg02390569 | 5.78E-05 | -0.0225     | 0.0055    | II                   | 8   | 145624983 | R      |
| cg06469440 | 5.80E-05 | -0.0171     | 0.0042    | II                   | 7   | 1000336   | F      |
| cg00785892 | 6.23E-05 | -0.0124     | 0.0031    | II                   | 14  | 70701435  | R      |
| cg14126493 | 6.26E-05 | 0.0144      | 0.0036    | I                    | 5   | 176831297 | R      |
| cg06969933 | 6.82E-05 | -0.0093     | 0.0023    | II                   | 16  | 88099740  | F      |
| cg14521987 | 7.52E-05 | 0.0092      | 0.0023    | II                   | 9   | 129236500 | F      |
| cg02173360 | 8.34E-05 | -0.0443     | 0.0112    | I                    | 17  | 41312467  | F      |
| cg01079738 | 8.48E-05 | 0.0408      | 0.0103    | I                    | 1   | 182922427 | R      |
| cg13834567 | 8.80E-05 | 0.0888      | 0.0225    | II                   | 19  | 42817981  | R      |
| cg22245862 | 9.61E-05 | -0.0204     | 0.0052    | II                   | 4   | 942544    | R      |
| cg04913109 | 9.61E-05 | -0.0156     | 0.0040    | I                    | 10  | 134538898 | R      |
| cg18970434 | 9.66E-05 | -0.0188     | 0.0048    | II                   | 14  | 106067003 | F      |
| cg25349034 | 1.02E-04 | 0.0133      | 0.0034    | II                   | 3   | 149265300 | F      |
| cg18196463 | 1.02E-04 | -0.0050     | 0.0013    | I                    | 5   | 1069235   | R      |
| cg03894119 | 1.06E-04 | -0.0060     | 0.0015    | I                    | 7   | 57247873  | R      |
| cg27414885 | 1.07E-04 | 0.0059      | 0.0015    | II                   | 1   | 112298991 | F      |
| cg26980987 | 1.08E-04 | -0.0151     | 0.0039    | II                   | 16  | 20754216  | F      |
| cg05253716 | 1.08E-04 | -0.0112     | 0.0029    | II                   | 12  | 129299332 | R      |
| cg03568793 | 1.09E-04 | -0.0088     | 0.0023    | II                   | 16  | 89620236  | F      |

|            |          |         |        |    |    |           |   |
|------------|----------|---------|--------|----|----|-----------|---|
| cg08993582 | 1.11E-04 | 0.0061  | 0.0016 | I  | 3  | 57678673  | F |
| cg11240431 | 1.11E-04 | -0.0153 | 0.0039 | II | 8  | 140971271 | R |
| cg25037677 | 1.12E-04 | -0.0202 | 0.0052 | II | 1  | 2437047   | R |
| cg09414620 | 1.13E-04 | 0.0350  | 0.0090 | II | 16 | 1213469   | F |
| cg11300341 | 1.16E-04 | -0.0119 | 0.0031 | II | 17 | 17689562  | R |
| cg00364644 | 1.18E-04 | -0.0141 | 0.0036 | I  | 16 | 88234627  | R |
| cg25226711 | 1.18E-04 | -0.0493 | 0.0127 | II | 11 | 1297385   | F |
| cg03948744 | 1.20E-04 | 0.0180  | 0.0046 | I  | 16 | 122563    | R |
| cg13632058 | 1.20E-04 | 0.0210  | 0.0054 | II | 9  | 117267392 | R |
| cg05465955 | 1.21E-04 | -0.0322 | 0.0083 | I  | 17 | 40715236  | F |
| cg27039821 | 1.22E-04 | -0.0070 | 0.0018 | I  | 14 | 101340965 | F |
| cg15992868 | 1.24E-04 | -0.0082 | 0.0021 | II | 7  | 128416520 | R |
| cg22658311 | 1.27E-04 | 0.0357  | 0.0093 | II | 4  | 177640279 | R |
| cg27551295 | 1.31E-04 | -0.0099 | 0.0026 | II | 17 | 45894580  | F |
| cg04155280 | 1.38E-04 | -0.0112 | 0.0029 | II | 17 | 26692719  | F |
| cg09055214 | 1.38E-04 | -0.0203 | 0.0053 | II |    | 152915087 | R |
| cg21836827 | 1.38E-04 | 0.0153  | 0.0040 | II | 6  | 29720549  | F |
| cg27241576 | 1.39E-04 | -0.0070 | 0.0018 | II | 16 | 81663253  | F |
| cg10171794 | 1.41E-04 | 0.0362  | 0.0094 | II | 16 | 10802361  | R |
| cg08170637 | 1.42E-04 | -0.0120 | 0.0031 | II | 17 | 79988088  | R |
| cg14086364 | 1.42E-04 | 0.0408  | 0.0107 | II | 5  | 150678334 | R |
| cg19659680 | 1.45E-04 | -0.0189 | 0.0049 | II | 11 | 9385487   | F |
| cg27232569 | 1.46E-04 | -0.0226 | 0.0059 | II | 2  | 232455630 | F |
| cg02328278 | 1.47E-04 | -0.0113 | 0.0030 | II | 5  | 112769927 | F |
| cg03035746 | 1.47E-04 | -0.0944 | 0.0247 | II | 2  | 74727286  | R |
| cg18733798 | 1.51E-04 | 0.0289  | 0.0076 | II | 14 | 103469879 | F |
| cg19957032 | 1.52E-04 | 0.0573  | 0.0150 | II | 14 | 52455805  | R |
| cg26005361 | 1.56E-04 | -0.0091 | 0.0024 | II | 19 | 42599851  | R |
| cg08079330 | 1.61E-04 | 0.0622  | 0.0164 | II | 14 | 76847792  | R |
| cg05236972 | 1.61E-04 | -0.0112 | 0.0029 | I  | 22 | 46933233  | F |
| cg12163823 | 1.64E-04 | 0.0283  | 0.0075 | I  | 2  | 242673721 | F |
| cg06864046 | 1.65E-04 | 0.0083  | 0.0022 | II | 12 | 89746505  | F |
| cg05502283 | 1.66E-04 | -0.0105 | 0.0028 | II | 19 | 13203715  | R |
| cg26191661 | 1.66E-04 | -0.0116 | 0.0031 | II | 1  | 16957414  | R |
| cg18530729 | 1.67E-04 | 0.0032  | 0.0008 | II | 8  | 30514814  | R |
| cg24830730 | 1.71E-04 | -0.0737 | 0.0195 | I  | 7  | 150653195 | F |
| cg09793809 | 1.73E-04 | -0.0096 | 0.0025 | II | 1  | 43352918  | R |
| cg07738268 | 1.77E-04 | -0.0152 | 0.0040 | II | 22 | 46659381  | R |
| cg15734436 | 1.77E-04 | -0.0261 | 0.0069 | II | 6  | 33047185  | R |
| cg13420647 | 1.80E-04 | -0.0640 | 0.0170 | II | 1  | 36883624  | F |
| cg17812026 | 1.82E-04 | -0.0052 | 0.0014 | I  | 17 | 1494379   | R |
| cg04462132 | 1.86E-04 | 0.1130  | 0.0301 | II | 6  | 161860635 | R |
| cg23474312 | 1.87E-04 | -0.0095 | 0.0025 | II | 6  | 158142707 | F |
| cg18294332 | 1.87E-04 | 0.0380  | 0.0101 | II | 5  | 56148274  | F |
| cg25797455 | 1.90E-04 | -0.0113 | 0.0030 | I  | 7  | 100064671 | R |
| cg00305285 | 1.90E-04 | -0.0363 | 0.0097 | I  | 1  | 1017115   | F |
| cg20248611 | 1.94E-04 | 0.0616  | 0.0164 | II | 12 | 34371861  | F |

|            |          |         |        |    |    |             |
|------------|----------|---------|--------|----|----|-------------|
| cg22495848 | 1.96E-04 | -0.0134 | 0.0036 | I  | 1  | 2425173 F   |
| cg24459560 | 1.97E-04 | 0.0155  | 0.0041 | II | 1  | 120162965 F |
| cg06490968 | 1.98E-04 | -0.0442 | 0.0118 | I  | 16 | 15974524 R  |
| cg27594095 | 2.00E-04 | -0.0087 | 0.0023 | I  | 6  | 31095276 R  |
| cg01930745 | 2.01E-04 | -0.0430 | 0.0115 | II | 1  | 899182 F    |
| cg11068558 | 2.03E-04 | -0.0225 | 0.0060 | I  | 8  | 53352237 R  |
| cg15120176 | 2.04E-04 | -0.0092 | 0.0025 | I  | 18 | 77142809 F  |

| UCSC_RefGene_Name       | UCSC_RefGene_Group | UCSC_CpG_Islands_Name                    |
|-------------------------|--------------------|------------------------------------------|
| VAC14                   | 3'UTR              | chr16:70719114-707                       |
| CSNK1G3;CSNK1G3;CSNK1G3 | 3'UTR;3'UTR;3'UTR  |                                          |
| MYLK2                   | Body               | chr20:30410547-304                       |
| PARD6A;ACD;ACD;PARD6A   | Body;TSS1500;      | chr16:67693451-676                       |
| SETD1B                  | Body               | chr12:122261329-12                       |
| MCF2L;MCF2L             | Body;Body          | chr13:113701833-11<br>chr3:9904331-99048 |
| SAP30BP                 | Body               |                                          |
| SLC25A10                | Body               | chr16:2077042-2077                       |
| TMEM95;TMEM95           | 5'UTR;1stExon      | chr17:79682525-796                       |
| SORCS2                  | Body               | chr17:7254622-7255                       |
| TCF25                   | Body               |                                          |
| UCKL1                   | Body               | chr20:62575724-625                       |
| MICB                    | Body               |                                          |
| H2AFY2                  | Body               |                                          |
| RIC8B                   | 3'UTR              |                                          |
| CD81                    | TSS1500            | chr11:2398223-2399                       |
| ANO9                    | Body               | chr11:430814-43177                       |
| LSS;LSS;LSS;LSS         | 3'UTR;3'UTR;3'UTR  |                                          |
| IGFBP4                  | Body               |                                          |
| ZBTB10;ZBTB10           | TSS1500;TSS1500    | chr8:81398429-8139                       |
| FAAH                    | TSS1500            | chr1:46859724-4686                       |
| KIAA0247                | 5'UTR              |                                          |
| CPSF1                   | Body               | chr8:145622979-145                       |
| F12                     | Body               | chr14:70700814-707                       |
| BANP;BANP               | Body;Body          | chr5:176830275-176                       |
| FAM125B                 | Body               | chr16:88101473-881                       |
| C1orf14;C1orf14         | 1stExon;5'UTR      | chr1:182921819-182                       |
| TMEM145                 | Body               | chr19:42817412-428                       |
| TMEM175                 | Body               | chr4:940613-941057                       |
| INPP5A                  | Body               | chr10:134539817-13<br>chr14:106066400-10 |
| WWTR1;WWTR1;WWTR1       | Body;Body;Body     |                                          |
| SLC12A7                 | Body               | chr5:1068746-10690                       |
| LOC642006               | TSS200             | chr7:57247588-5724                       |
| DDX20;C1orf183          | Body;TSS1500       | chr1:112298041-112                       |
| THUMPD1                 | TSS1500            | chr16:20752646-207                       |
| SLC15A4;MGC16384        | Body;TSS200        |                                          |
| SPG7                    | Body               |                                          |

|                      |               |                    |
|----------------------|---------------|--------------------|
| FAM116A              | 1stExon       | chr3:57678339-5767 |
| TRAPPC9;TRAPPC9      | Body;Body     | chr8:140971270-140 |
|                      |               | chr1:2435041-24352 |
| CACNA1H;CACNA1H      | Body;Body     | chr16:1217128-1217 |
| RAI1                 | 5'UTR         | chr17:17685016-176 |
|                      |               | chr16:88233988-882 |
| TOLLIP               | 3'UTR         | chr11:1298009-1298 |
| RHBDF1;RHBDF1        | 5'UTR;1stExon | chr16:122017-12287 |
| DFNB31;DFNB31        | 5'UTR;1stExon | chr9:117266468-117 |
| COASY;COASY;COASY;CO | 1stExon;Body; | chr17:40714087-407 |
| MIR665               | TSS1500       |                    |
| OPN1SW               | TSS1500       |                    |
| VEGFC                | Body          |                    |
| OSBPL7               | Body          | chr17:45890956-458 |
| SEBOX;SEBOX          | Body;TSS1500  |                    |
| DUSP9                | Body          | chrX:152912491-152 |
|                      |               | chr6:29720381-2972 |
| CMIP;CMIP            | Body;Body     |                    |
| RAC3;LRRC45          | TSS1500;Body  | chr17:79987983-799 |
| SLC36A3;SLC36A3      | Body;Body     |                    |
|                      |               | chr11:9385837-9386 |
| TSSK1B;MCC           | 1stExon;Body  |                    |
| LBX2                 | Body          | chr2:74725039-7472 |
| CDC42BPB             | Body          |                    |
| C14orf166            | TSS1500       | chr14:52456128-524 |
| POU2F2               | Body          | chr19:42599507-426 |
| ESRRB                | 5'UTR         | chr14:76842506-768 |
| CELSR1               | TSS200        | chr22:46929317-469 |
| D2HGDH               | TSS1500       | chr2:242673653-242 |
| DUSP6;DUSP6          | TSS1500;TSS15 | chr12:89745168-897 |
| NFIX                 | 3'UTR         | chr19:13207375-132 |
| CROCCL1              | TSS200        |                    |
| GTF2E2               | 5'UTR         | chr8:30515170-3051 |
| KCNH2;KCNH2;KCNH2    | Body;Body;TSS | chr7:150655108-150 |
|                      |               | chr1:43352785-4335 |
| PKDREJ               | TSS200        | chr22:46658397-466 |
| HLA-DPB1             | Body          | chr6:33048416-3304 |
| OSCP1                | 3'UTR         |                    |
| SLC43A2              | Body          | chr17:1492086-1492 |
| PARK2;PARK2;PARK2    | Body;Body;Bod |                    |
| MAP3K1               | Body          |                    |
| TSC22D4              | Body          |                    |
|                      |               | chr1:1016863-10174 |
|                      |               | chr12:34371627-343 |

|          |       |                    |
|----------|-------|--------------------|
| PLCH2    | Body  |                    |
| ZNF697   | 3'UTR | chr1:120165302-120 |
| C16orf63 | Body  |                    |
| PSORS1C1 | 5'UTR |                    |
| KLHL17   | Body  | chr1:894313-902654 |
|          |       | chr18:77138797-771 |

Relation\_to\_UCSC\_CpG\_Island  
S\_Shore

S\_Shelf  
S\_Shore  
N\_Shelf

S\_Shore  
Island

N\_Shelf  
S\_Shore  
S\_Shelf

Island

N\_Shore  
Island

N\_Shore  
N\_Shore

S\_Shore

S\_Shore  
Island  
N\_Shore

Island  
Island  
S\_Shore  
N\_Shore  
Island

S\_Shore  
Island  
Island  
S\_Shore

Island  
Island  
S\_Shore  
N\_Shelf  
S\_Shelf  
S\_Shore  
N\_Shore  
Island  
Island  
Island

S\_Shelf

S\_Shore  
Island

Island

N\_Shore

S\_Shore

N\_Shore  
Island  
S\_Shelf  
Island  
Island  
Island  
N\_Shelf

N\_Shore  
N\_Shore  
Island  
S\_Shore  
N\_Shore

S\_Shelf

Island  
Island



N\_Shelf

Island

S\_Shelf
